# Supplementary material
Source: publisher figshare collection journal article supplement (https://gsapubs.figshare.com/ndownloader/files/22759226)
Supplement: Supplementary file 1 [file 22759226]

# **GSA Data Repository 2009272: The effects of flank collapses on volcano plumbing systems**

Andrea Manconi, Marc-Antoine Longpré, Thomas R. Walter,  
Valentin R. Troll and Thor H. Hansteen

The following supplementary material includes:

1. Details of magma density calculations procedures.
2. Details on construction of the finite element models and the assumed loading/unloading conditions.
3. Details on the effects of different melt percentages on elastic properties of the magmatic reservoir and on the effects of different magma reservoir shapes.
4. Details on limitations and the validity of the finite element models.
5. Discussion of the possible effects of mass-wasting on melt production beneath ocean island volcanoes.
6. Supplementary References.
7. Supplementary Tables and Figures:

Table DR1: Sampling/outcrop localities, respective rock type and, where available, calculated density. Table DR2: Geometrical parameters used for the finite element simulations of the conical edifice and that of volcano flank collapse. Figure DR1: Effect of different melt% on the elastic properties of the storage zone. Figure DR2: Effect of shape of magma storage zone on decompression.

## 1. Magma density calculations procedures

Volcanic products of El Hierro were collected during two field campaigns and were subsequently analyzed for whole-rock and groundmass major element compositions. We estimated pre-eruptive magma densities for representative El Hierro samples (see Table DR1), following the procedure outlined by Spera (2000) and using initial volatile contents approximated on the basis of Dixon et al. (1997). That is, dissolved water contents were taken as  $H_2O=3(P_2O_5)$  wt% and initial carbon dioxide as  $CO_2=2(H_2O)$  by mass. El Hierro samples give a range of  $H_2O=1.4-4.0$  wt% and  $CO_2=2.8-7.9$  wt%, comparable to bulk volatile contents inferred by Dixon et al. (1997), for undegassed alkaline Hawaiian magmas. For the density calculations, we assumed  $f_{O_2}=QFM+1$ ,  $P=900$  MPa (typical pressure of the main magma storage zone under Canarian shield volcanoes, see e.g. Klügel et al. 2005, Longpré et al. 2008 and Stroncik et al. 2008), and melts at their liquidus temperature, calculated using PETROLOG (Danyushevsky, 2001). The presence of phenocrysts in magma was also taken into account. For samples with <10 vol. % olivine + clinopyroxene, the density of the melt was taken as a reasonable approximation of the magma density. For samples with >10 vol. % olivine + clinopyroxene, the magma density was calculated using a melt density of  $2,780 \text{ kg/m}^3$  (average from groundmass samples) and observed modal phenocryst proportions ( $\rho_{\text{olivine}}=3,400 \text{ kg/m}^3$  ( $\sim F_{80}$ ) and  $\rho_{\text{clinopyroxene}}=3,200 \text{ kg/m}^3$ ). Plagioclase (due to its density nearly equal to melt density) as well as Fe-Ti oxide and amphibole (due to their small abundances) were considered negligible for these calculations.

## 2. Construction of the finite element models, loading/unloading conditions and mechanical properties

The finite element models described and discussed in our study were constructed using the commercial software ABAQUS™. The software and the related “Analysis User's

Manual” are available at [www.simulia.com](http://www.simulia.com). For simplicity, the models are axisymmetric (as shown in Fig. 2a), thus the edifice load was applied as a triangular load using the formulation:

$$L(r) = \rho_v \cdot g \cdot H_i \cdot \left(1 - \frac{r}{R}\right) \quad (\text{DR1})$$

where  $L(r)$  is the load calculated at the radial coordinate ( $r$ ),  $\rho_v$  is the density of the volcanic material ( $2,700 \text{ kg/m}^3$ ),  $g$  is the gravitational acceleration ( $9.81 \text{ m/s}^2$ ),  $H_i$  is the initial height of the edifice (6 km) and  $R$  is the radius at the base of the edifice (30 km, cf. Gee et al., 2001). In a second step, we removed 3% of the initial load equivalent to  $180 \text{ km}^3$  (see also Table DR2). Both the loading and the unloading step were simulated using the FORTRAN user subroutine \*DLOAD in ABAQUS. Far field boundary conditions were applied by means of a set of infinite elements on the right side and at the bottom of the models. The maximum dimension of the elements in the areas of interest for pressure calculations was set to 100 m, as the best compromise between resolution and computational time (Fagan, 1992).

Geometrical parameters  $H_i$  and  $R$  used to calculate the initial loads for all localities were either collected from literature information or approximated based on analysis of digital elevation models or bathymetric maps (see Table DR2). This procedure, as well as the axial symmetric assumption of the edifices’ loads, may have introduced uncertainties in the initial edifice volume estimates. On the other hand, flank collapse volumes considered in this study are well constrained. In our simulations, effects due to collapse are distributed over the entire edifice, while in reality they are likely to concentrate on particular portions of the volcanic system. For example, the effects of the El Golfo debris avalanche were probably much more focused on the El Golfo volcano ( $\sim 2,000 \text{ km}^3$ ) than on the whole El Hierro edifice ( $\sim 5,500 \text{ km}^3$ ), which would have led to a higher effective unloading fraction on the former. For this reason, the assumption of

the unloading volume as portion of the total edifice compensates for the potential error on the estimation of the initial volume.

The effects of seawater load and material redistribution due to collapse were tested in separate models not explicitly shown in the main text for the following reasons: (1) Assuming that the seawater load is invariant during the relative time span considered by our models, its simulation does not affect the pressure changes caused by a static flank collapse. (2) In the case of the El Golfo landslide, which is classified as a debris avalanche, the materials are thought to have been redistributed as a relatively thin layer over the seafloor covering an extended area and distances up to 60 km from the edifice (cf. Gee et al., 2001). The latter inclusion in our simulations only slightly decreased the retrieved pressure changes caused by the flank collapse in the area of our main interest, i.e. the magma reservoirs located directly beneath the El Hierro edifice. Thus, the model simplifications shown in the main text of the paper are valid for studying pressure changes at magma chamber levels.

### **3. Effects of melt % and of different shape of magma reservoir**

Numerical models of magma reservoirs commonly consider magma as an incompressible fluid, with bulk modulus varying between 1 and 10 GPa (e.g., Huppert and Woods, 2002; Pinel and Jaupart, 2005). Such assumptions imply that the mechanical behavior of magma reservoirs is dominated by the properties of the melt phase. However, petrological evidence suggests that magma plumbing systems, such as those of e.g. El Hierro (Stroncik et al., 2008) and other Canary Island volcanoes (Klügel et al., 2005; Longpré et al., 2008), as well as Kilauea volcano, Hawaii (Tilling and Dvorack, 1993), may consist of a plexus of dike- and sill-like fractures in the uppermost mantle, where partially crystallized magmas are stored. In our models, we thus consider El Hierro's magma storage zone as a multiphase system, where molten and crystallized

material co-exist. From this assumption entails that the storage zone in our models is more compressible than the surrounding rock, in agreement with several independent analyses done on basaltic magmas (e.g., Ryan, 1980 and references therein; Blake, 1981).

Walsh (1969) derived theoretical relationships for the mechanical properties of a crystal-melt mixture. This study assumes an elastic and isotropic matrix (hereinafter identified by the subscript “c”), specified by its bulk modulus ( $K_c$ ) and shear modulus ( $G_c$ ), and an elastic, isotropic and dilute suspension of ellipsoidal melt parcels (hereinafter identified by the subscript “m”), which are characterized by their bulk modulus ( $K_m$ ), shear modulus ( $G_m$ ) and geometric aspect ratio (minor/major axis herein set to 0.001, cf. Ryan, 1980). The melt parcels decrease the effective elastic response of the basaltic magmas.

Since basalts are organized in a millimeter scale, we consider that the assumption of an isotropic elastic behavior for the magmatic reservoir (kilometer scale) as a whole, which is defined by a unique value of “effective” elastic parameters, is reasonable. To calculate the values of effective Young’s modulus ( $E$ ) and effective Poisson’s ratio ( $\nu$ ) for the magmatic reservoir used in our modeling, we exploited the following approach. We first fixed the value of  $E_c=80$  GPa and  $\nu=0.25$  for fully crystallized basalt (Ryan, 1980) and calculated  $K_c$  and  $G_c$ . In addition, we defined  $G_m$  as equal to 0 (fluids do not support shear stresses), and we considered a range for  $K_m$  between 1 and 10 GPa (Huppert and Woods, 2002; Pinel and Jaupart, 2005). Finally, we calculated the values for the effective  $E$  and  $\nu$  for crystal-melt mixtures (melt % from 0 to 100), using the relationships proposed by Walsh (1969). In Figure DR1-A&B we show the results of these calculations. Depending on the value of  $K_m$ , hence on the compressibility of the melt phase, the mechanical setups defined by models 1-3 may represent the elastic

response caused by different ranges of melt percentages within the magma reservoir. In Figure DR1-C&D we compare the decompression caused by the El Golfo landslide in a profile beneath the edifice, corresponding to the axis of symmetry of the finite element models, see Fig. 2A of the main text. Clearly, a relative increase of the melt percentage in the storage zone (Figure DR1-D) causes a decrease of its overall elastic stiffness and influences the elastic response of the magmatic reservoir, enhancing the effect of the decompression due to mass unloading.

Furthermore, in Figure DR2 we compare the decompression occurring in a homogeneous half-space with models that consider a range of shapes for the simulated magma storage zone. Oblate-shaped (OS) reservoirs tend to favor slightly higher pressure changes compared with spherical-shaped (SS) or prolate-shaped (PS) reservoirs. However, the general directions of the vectors (i.e. from the bottom to the top of the reservoir) as well as the magnitudes of the differential pressure are largely unaffected.

The assumption of further heterogeneities, as for example a layered lithosphere, might affect the pressure changes at shallow levels but, in our tests, had no major effect on the magma reservoir surroundings. Based on these considerations, we can state that our results give a conservative but realistic representation of static pressure changes caused by surface mass-wasting at the discussed volcanoes.

#### **4. Limitations and validity of the models**

High pressures and temperatures, co-existence of several polyphase aggregates, volatiles and fluids add complexity to the analysis of magma reservoir feedback processes using simplified mechanical models. Nevertheless, for short time-scales, we consider the assumption of an elastic regime appropriate, as that of the magma reservoirs as zones of structural weakening causing localization of stresses (Kanamori, 1972; Gudmundsson,

1988). On longer time-scales, viscous effects may also play an important role in determining the amount of stress changes in the magma reservoir surroundings (Newman et al., 2006). Moreover, future studies may refine quantitative evaluations of pressure changes due to volcano flank collapse by adding complexity to the geometries of the volcanic edifices, collapse scars and magma plumbing systems. More complex dynamic modeling and material properties, on the other hand, would allow better assessment of feedback processes caused by the pressure gradients revealed by our simulations. However, we argue that none of these potential improvements would change the principal outcome of our work.

## **5. Possible effects on melt production at ocean island volcanoes**

Differing unloading timescales and geometries for deglaciation (thousands of years, sheet-like) and catastrophic debris avalanches on volcano flanks (minutes to days?, wedge-like) imply different rates and structural patterns in the systems' accommodation to the new stress conditions. In both cases, however, the net stress change, that is decompression, is analogous and useful comparisons can be made with studies that have investigated the effects of deglaciation on Icelandic volcanism. For example, Jull and McKenzie (1996) have shown that ice unloading during deglaciation can cause increased melt production in Iceland's spreading ridge system (see also MacLennan et al., 2002). Using numerical models, these authors found that, despite largest decompression amplitudes just below the ice sheet ( $\Delta P = 20$  MPa), the maximum effect on mantle melting was actually much deeper, at a depth of about 80 km. In the presence of both a mantle plume and a spreading ridge, the young Icelandic crust and lithosphere are warmer and more ductile than old oceanic or continental upper mantle. The resulting melting interval is thus thick (about 100 km), from the base of the crust at 20 km depth to the solidus at about 115 km depth.

175       The Icelandic case therefore differs considerably from pure hot-spot settings without  
176 spreading ridge, such as Hawaii or the Canary Islands. There, the older and colder  
177 oceanic lithosphere results in a significant mechanical boundary layer. Under these  
178 conditions, the melting zone is thinner and restrained at much greater depth, i.e. in the  
179 spinel and garnet (mostly) stability fields between about ~70-140 km depth (Watson and  
180 McKenzie, 1991; Hoernle and Schmincke, 1993).

181       The above-mentioned considerations, combined with the results of our numerical  
182 models, which imply negligible decompression at depths of magma generation, suggest  
183 that the unloading due to large-scale volcano flank collapse is unlikely to cause effects  
184 of similar magnitude on ocean islands as has been described for deglaciation periods in  
185 Iceland.



## 6. References cited in the Supplementary Information

- Blake, S., 1981, Volcanism and the dynamics of open magma chambers: *Nature*, v. 289, p. 783–785.
- Danyushevsky, L. V., 2001, The effect of small amounts of H<sub>2</sub>O on crystallisation of mid-ocean ridge and backarc basin magmas: *Journal of Volcanology and Geothermal Research*, v. 110, p. 265–280.
- Dixon, J.E., Clague, D.A., Wallace, P., and Poreda, R., 1997, Volatiles in alkalic basalts from the North Arch volcanic field, Hawaii: extensive degassing of deep submarine-erupted alkalic series lavas: *Journal of Petrology*, v. 38, p. 911–939.
- Fagan, M. J., 1992, *Finite Element Analysis: Theory and Practice*: Longman,
- Gee, M. J. R., Watts, A. B., Masson, D. G. and Mitchell, N. C., 2001, Landslides and the evolution of El Hierro in the Canary Islands: *Marine Geology*, v. 177, p. 271–293.
- Gudmundsson, A., 1988, Effect of tensile stress concentration around magma chambers on intrusion and extrusion frequencies: *Journal of Volcanology and Geothermal Research*, v. 35, p. 179–194.
- Hoernle, K., and Schmincke, H.-U., 1993, The role of partial melting in the 15-Ma geochemical evolution of Gran Canaria: A blob model for the Canary Hotspot: *Journal of Petrology*, v. 34, p. 599–626.
- Hora, J. M., Singer, B. S. and Wörner G., 2007, Volcano evolution and eruptive flux on the thick crust of the Andean Central Volcanic Zone: 40Ar/39Ar constraints from Volcan Paríacota, Chile: *Geological Society of America Bulletin* v. 119, p. 343–362.
- Huppert, H. E., and Woods, A. W., 2002, The role of volatiles in magma chamber dynamics: *Nature*, p. 420, v. 493–495.
- Kanamori, H., 1972, Relation between tectonic stress, great earthquakes and earthquake swarms: *Tectonophysics*, v. 14, p. 1–12.
- Klügel, A., Hansteen, T. H. and Galipp K., 2005, Magma storage and underplating beneath Cumbre Vieja volcano, La Palma (Canary Islands): *Earth and Planetary Science Letters*, v. 236, p. 211–226.
- Longpré, M., Troll, V. R. and Hansteen T. H., 2008, Upper mantle magma storage and transport under a Canarian shield-volcano, Teno, Tenerife (Spain): *Journal of Geophysical Research*, v. 113, B-08203.
- MacLennan, J. et al., 2002, The link between volcanism and deglaciation in Iceland: *Geochemistry Geophysics Geosystems*, v. 3, p. 1062.
- Newman, A. V., Dixon, T. H. and Gourmelen N., 2006, A four-dimensional

viscoelastic deformation model for Long Valley Caldera, California, between 1995 and 2000: *Journal of Volcanology and Geothermal Research*, v. 150, p. 244–269.

Patriat, M. et al., 2002, Deep crustal structure of the Tuamotu plateau and Tahiti (French Polynesia) based on seismic refraction data: *Geophysical Research Letters*, v. 29, p. 1656.

Robinson, J. E., and Eakins, B. W., 2006, Calculated volumes of individual shield volcanoes at the young end of the Hawaiian Ridge: *Journal of Volcanology and Geothermal Research*, v. 151, p. 309–317.

Schmincke, H.-U., 1998, *Gran Canaria: Geological Field Guide*, Pluto Press.

Siebert, L., Begöt, J. E. and Glicken H., 1995, The 1883 and late-prehistoric eruptions of Augustine volcano, Alaska: *Journal of Volcanology and Geothermal Research*, v. 66, p. 367–395.

Spera, F. J., 2000, Physical properties of magma: *Encyclopedia of Volcanoes*, p. 171–190.

Tilling, R. I., and Dvorak, J. J., 1993, Anatomy of a basaltic volcano: *Nature*, v. 363, p.125–133.

Voight, B., Glicken, H., Janda, R. and Douglas P., 1981, Catastrophic rockslide avalanche of May 18. In P. W. Lipman and D. R. Mullineaux, *The 1980 Eruptions of Mount St. Helens* .

Walter, T. R., 2003, Buttressing and fractional spreading of Tenerife, an experimental approach on the formation of rift zones: *Geophysical Research Letters*, v. 30, p. 1296.

Walsh, J.B., 1969, New analysis of Attenuation in Partially melted rock: *Journal of Geophysical Research*, v.74, p. 4333-4337.

Watson, S., and McKenzie, D., 1991, Melt generation by plumes: A study of Hawaiian volcanism: *Journal of Petrology*, v. 32, p. 501–537.

## 7. Supplementary Tables and Figures:

**Table DR1:** Outcrop localities investigated on El Hierro Island.

|    | Latitude (°N) | Longitude (°W) | Altitude (m) | Stratigraphy | Lava Type  | Density(kg/m <sup>3</sup> ) |
|----|---------------|----------------|--------------|--------------|------------|-----------------------------|
| 1  | 27,73019      | 18,05931       | 1382         | post-EGL     | basalt     | —                           |
| 2  | 27,73083      | 18,05921       | 1381         | post-EGL     | ankaramite | —                           |
| 3  | 27,73133      | 18,05939       | 1372         | post-EGL     | ankaramite | —                           |
| 4  | 27,72932      | 18,05962       | 1371         | post-EGL     | basalt     | —                           |
| 5  | 27,73137      | 18,05931       | 1370         | post-EGL     | ankaramite | —                           |
| 6  | 27,73288      | 18,06004       | 1368         | post-EGL     | ankaramite | —                           |
| 7  | 27,73246      | 18,05962       | 1368         | post-EGL     | ankaramite | —                           |
| 8  | 27,73319      | 18,06025       | 1366         | post-EGL     | ankaramite | —                           |
| 9  | 27,73270      | 18,05985       | 1365         | post-EGL     | ankaramite | 2970                        |
| 10 | 27,73338      | 18,06026       | 1361         | post-EGL     | ankaramite | —                           |
| 11 | 27,73227      | 18,05908       | 1355         | post-EGL     | ankaramite | —                           |
| 12 | 27,73158      | 18,05857       | 1355         | post-EGL     | ankaramite | —                           |
| 13 | 27,73028      | 18,05850       | 1347         | post-EGL     | basalt     | 2870                        |
| 14 | 27,72953      | 18,05870       | 1338         | post-EGL     | basalt     | 2730                        |
| 15 | 27,73271      | 18,05805       | 1335         | post-EGL     | ankaramite | —                           |
| 16 | 27,72820      | 18,05807       | 1327         | post-EGL     | basalt     | 2740                        |
| 17 | 27,73317      | 18,05791       | 1326         | post-EGL     | ankaramite | —                           |
| 18 | 27,72806      | 18,05817       | 1325         | post-EGL     | basalt     | —                           |
| 19 | 27,73385      | 18,05820       | 1310         | post-EGL     | ankaramite | —                           |
| 20 | 27,72886      | 18,05250       | 1262         | post-EGL     | basalt     | 2680                        |
| 21 | 27,73010      | 18,05216       | 1261         | post-EGL     | basalt     | —                           |
| 22 | 27,73165      | 18,05142       | 1243         | post-EGL     | basalt     | —                           |
| 23 | 27,77451      | 17,94374       | 1003         | post-EGL     | basalt     | —                           |
| 24 | 27,74072      | 18,05241       | 934          | post-EGL     | basalt     | —                           |
| 25 | 27,73977      | 18,04936       | 934          | post-EGL     | basalt     | —                           |
| 26 | 27,73937      | 18,04603       | 933          | post-EGL     | basalt     | —                           |
| 27 | 27,74119      | 18,05684       | 895          | post-EGL     | ankaramite | —                           |
| 28 | 27,74164      | 18,06080       | 878          | post-EGL     | ankaramite | —                           |
| 29 | 27,74064      | 18,06523       | 849          | post-EGL     | ankaramite | —                           |
| 30 | 27,73991      | 18,03150       | 847          | post-EGL     | basalt     | —                           |
| 31 | 27,73992      | 18,03151       | 847          | post-EGL     | ankaramite | —                           |
| 32 | 27,73977      | 18,02964       | 832          | post-EGL     | ankaramite | —                           |
| 33 | 27,74014      | 18,06725       | 831          | post-EGL     | ankaramite | —                           |
| 34 | 27,73954      | 18,06931       | 825          | post-EGL     | ankaramite | —                           |
| 35 | 27,73852      | 18,07070       | 810          | post-EGL     | basalt     | —                           |
| 36 | 27,73778      | 18,07189       | 806          | post-EGL     | ankaramite | —                           |
| 37 | 27,73699      | 18,07699       | 801          | post-EGL     | ankaramite | —                           |
| 38 | 27,73689      | 18,07260       | 796          | post-EGL     | ankaramite | —                           |
| 39 | 27,73600      | 18,07367       | 791          | post-EGL     | ankaramite | —                           |
| 40 | 27,73867      | 18,02507       | 785          | post-EGL     | ankaramite | —                           |
| 41 | 27,75332      | 17,98959       | 762          | post-EGL     | basalt     | —                           |
| 42 | 27,75334      | 17,98994       | 745          | post-EGL     | basalt     | —                           |

|    |          |          |      |           |              |      |
|----|----------|----------|------|-----------|--------------|------|
| 43 | 27,75341 | 17,99020 | 718  | post-EGL  | basalt       | —    |
| 44 | 27,75354 | 17,99068 | 686  | post-EGL  | basalt       | —    |
| 45 | 27,75346 | 17,99136 | 650  | post-EGL  | basalt       | —    |
| 46 | 27,75168 | 17,99258 | 633  | post-EGL  | basalt       | —    |
| 47 | 27,75229 | 17,99379 | 557  | post-EGL  | basalt       | —    |
| 48 | 27,74473 | 18,02584 | 540  | post-EGL  | ankaramite   | —    |
| 49 | 27,74486 | 18,10117 | 450  | post-EGL  | basalt       | —    |
| 50 | 27,74500 | 18,10090 | 430  | post-EGL  | basalt       | —    |
| 51 | 27,75355 | 18,00350 | 379  | post-EGL  | basalt       | —    |
| 52 | 27,75127 | 18,05506 | 276  | post-EGL  | ankaramite   | 2940 |
| 53 | 27,74722 | 18,08758 | 264  | post-EGL  | ankaramite   | —    |
| 54 | 27,74695 | 18,08646 | 261  | post-EGL  | ankaramite   | —    |
| 55 | 27,74810 | 18,09251 | 257  | post-EGL  | ankaramite   | —    |
| 56 | 27,74708 | 18,08386 | 257  | post-EGL  | ankaramite   | —    |
| 57 | 27,74709 | 18,08387 | 257  | post-EGL  | plag. basalt | —    |
| 58 | 27,75028 | 18,06707 | 256  | post-EGL  | ankaramite   | —    |
| 59 | 27,74660 | 18,07963 | 242  | post-EGL  | ankaramite   | 2890 |
| 60 | 27,75024 | 18,06703 | 241  | post-EGL  | ankaramite   | —    |
| 61 | 27,75052 | 18,01094 | 190  | post-EGL  | aph. basalt  | 2620 |
| 62 | 27,75223 | 18,09663 | 134  | post-EGL  | basalt       | —    |
| 63 | 27,78235 | 18,00092 | 44   | post-EGL  | ankaramite   | 2910 |
| 64 | 27,75696 | 18,10941 | 13   | post-EGL  | basalt       | —    |
| 65 | 27,72587 | 18,02609 | 1342 | uncertain | aph. basalt  | —    |
| 66 | 27,72339 | 18,03004 | 1315 | uncertain | aph. basalt  | —    |
| 67 | 27,72202 | 18,02584 | 1269 | uncertain | basalt       | —    |
| 68 | 27,72195 | 18,02414 | 1264 | uncertain | aph. basalt  | —    |
| 69 | 27,71388 | 18,01479 | 1257 | uncertain | basalt       | —    |
| 70 | 27,72250 | 18,02218 | 1252 | uncertain | basalt       | —    |
| 71 | 27,72443 | 18,08560 | 1189 | uncertain | ankaramite   | —    |
| 72 | 27,72297 | 18,08508 | 1147 | uncertain | ankaramite   | —    |
| 73 | 27,72298 | 18,08509 | 1147 | uncertain | aph. basalt  | —    |
| 74 | 27,71270 | 18,01911 | 1121 | uncertain | basalt       | —    |
| 75 | 27,72532 | 18,09079 | 1106 | uncertain | aph. basalt  | 2640 |
| 76 | 27,71311 | 18,02191 | 1090 | uncertain | basalt       | —    |
| 77 | 27,71009 | 18,02308 | 1042 | uncertain | aph. basalt  | —    |
| 78 | 27,72260 | 18,09134 | 1025 | uncertain | aph. basalt  | —    |
| 79 | 27,72261 | 18,09135 | 1025 | uncertain | ankaramite   | 2940 |
| 80 | 27,72084 | 18,08935 | 1006 | uncertain | ankaramite   | —    |
| 81 | 27,71295 | 18,02842 | 1002 | uncertain | basalt       | —    |
| 82 | 27,71330 | 18,03263 | 970  | uncertain | basalt       | —    |
| 83 | 27,71888 | 18,09406 | 936  | uncertain | ankaramite   | —    |
| 84 | 27,71889 | 18,09407 | 936  | uncertain | aph. basalt  | —    |
| 85 | 27,71264 | 18,03741 | 932  | uncertain | aph. basalt  | —    |
| 86 | 27,71323 | 18,03857 | 928  | uncertain | basalt       | —    |
| 87 | 27,72066 | 18,09779 | 906  | uncertain | ankaramite   | —    |
| 88 | 27,72067 | 18,09780 | 906  | uncertain | basalt       | —    |
| 89 | 27,72369 | 18,10361 | 852  | uncertain | basalt       | —    |
| 90 | 27,72370 | 18,10362 | 852  | uncertain | ankaramite   | —    |
| 91 | 27,79772 | 17,96879 | 829  | uncertain | basalt       | —    |
| 92 | 27,79773 | 17,96880 | 829  | uncertain | ankaramite   | —    |

|     |          |          |      |           |              |      |
|-----|----------|----------|------|-----------|--------------|------|
| 93  | 27,72468 | 18,10689 | 826  | uncertain | ankaramite   | —    |
| 94  | 27,73771 | 17,95242 | 809  | uncertain | aph. basalt  | —    |
| 95  | 27,69630 | 18,00453 | 799  | uncertain | aph. basalt  | —    |
| 96  | 27,73738 | 17,95302 | 798  | uncertain | basalt       | —    |
| 97  | 27,69747 | 17,99642 | 785  | uncertain | ankaramite   | —    |
| 98  | 27,69651 | 17,99954 | 785  | uncertain | ankaramite   | —    |
| 99  | 27,69670 | 18,01235 | 782  | uncertain | basalt       | —    |
| 100 | 27,73633 | 17,95210 | 728  | uncertain | basalt       | —    |
| 101 | 27,70085 | 18,02648 | 712  | uncertain | basalt       | —    |
| 102 | 27,73576 | 17,95233 | 704  | uncertain | basalt       | —    |
| 103 | 27,72735 | 18,11848 | 693  | uncertain | aph. basalt  | —    |
| 104 | 27,68669 | 17,98540 | 674  | uncertain | aph. basalt  | —    |
| 105 | 27,73526 | 17,95251 | 643  | uncertain | basalt       | —    |
| 106 | 27,68589 | 17,98722 | 642  | uncertain | ankaramite   | —    |
| 107 | 27,68488 | 17,98928 | 627  | uncertain | basalt       | —    |
| 108 | 27,68334 | 17,99472 | 576  | uncertain | ankaramite   | —    |
| 109 | 27,68145 | 17,99572 | 551  | uncertain | basalt       | —    |
| 110 | 27,73410 | 17,95331 | 545  | uncertain | basalt       | —    |
| 111 | 27,81238 | 17,96622 | 524  | uncertain | ankaramite   | —    |
| 112 | 27,68382 | 18,00867 | 517  | uncertain | basalt       | —    |
| 113 | 27,68240 | 18,00198 | 514  | uncertain | basalt       | —    |
| 114 | 27,68235 | 18,00557 | 509  | uncertain | basalt       | —    |
| 115 | 27,73347 | 17,95434 | 497  | uncertain | basalt       | —    |
| 116 | 27,68439 | 18,01318 | 490  | uncertain | aph. basalt  | —    |
| 117 | 27,78937 | 17,92105 | 479  | uncertain | aph. basalt  | —    |
| 118 | 27,68597 | 18,01764 | 470  | uncertain | basalt       | —    |
| 119 | 27,68598 | 18,01765 | 470  | uncertain | ankaramite   | —    |
| 120 | 27,73282 | 17,95438 | 449  | uncertain | basalt       | —    |
| 121 | 27,73791 | 18,14196 | 379  | uncertain | ankaramite   | —    |
| 122 | 27,73163 | 17,95443 | 361  | uncertain | basalt       | —    |
| 123 | 27,74719 | 18,14456 | 334  | uncertain | ankaramite   | —    |
| 124 | 27,72349 | 18,14470 | 310  | uncertain | aph. basalt  | —    |
| 125 | 27,74796 | 18,14239 | 307  | uncertain | ankaramite   | —    |
| 126 | 27,74797 | 18,14240 | 307  | uncertain | basalt       | —    |
| 127 | 27,73107 | 17,95418 | 302  | uncertain | basalt       | —    |
| 128 | 27,75426 | 18,14399 | 248  | uncertain | ankaramite   | 2960 |
| 129 | 27,75427 | 18,14400 | 248  | uncertain | aph. basalt  | 2590 |
| 130 | 27,72990 | 17,95430 | 210  | uncertain | aph. basalt  | —    |
| 131 | 27,72821 | 17,95438 | 174  | uncertain | aph. basalt  | —    |
| 132 | 27,70738 | 18,14677 | 125  | uncertain | basalt       | 2830 |
| 133 | 27,64695 | 17,99310 | 115  | uncertain | basalt       | 2850 |
| 134 | 27,75660 | 18,14840 | 60   | uncertain | ankaramite   | 3020 |
| 135 | 27,75839 | 18,14964 | 33   | uncertain | ankaramite   | —    |
| 136 | 27,72521 | 18,05244 | 1464 | pre-EGL   | basalt       | —    |
| 137 | 27,72566 | 18,06711 | 1417 | pre-EGL   | ankaramite   | 2890 |
| 138 | 27,72740 | 18,04769 | 1407 | pre-EGL   | basalt       | —    |
| 139 | 27,72550 | 18,04939 | 1407 | pre-EGL   | basalt       | 2870 |
| 140 | 27,72490 | 18,05349 | 1392 | pre-EGL   | plag. basalt | 2600 |
| 141 | 27,72490 | 18,05349 | 1392 | pre-EGL   | ankaramite   | 2880 |
| 142 | 27,72649 | 18,05597 | 1346 | pre-EGL   | plag. basalt | —    |

|     |          |          |      |         |              |      |
|-----|----------|----------|------|---------|--------------|------|
| 143 | 27,72284 | 18,05528 | 1313 | pre-EGL | ankaramite   | —    |
| 144 | 27,72268 | 18,06655 | 1300 | pre-EGL | ankaramite   | —    |
| 145 | 27,72399 | 18,07506 | 1270 | pre-EGL | ankaramite   | 2960 |
| 146 | 27,75856 | 17,97703 | 1248 | pre-EGL | aph. basalt  | 2550 |
| 147 | 27,75862 | 17,97679 | 1244 | pre-EGL | ankaramite   | 3000 |
| 148 | 27,75862 | 17,97579 | 1233 | pre-EGL | ankaramite   | —    |
| 149 | 27,76259 | 17,98095 | 1201 | pre-EGL | basalt       | —    |
| 150 | 27,76165 | 17,98055 | 1167 | pre-EGL | aph. basalt  | —    |
| 151 | 27,76132 | 17,98047 | 1155 | pre-EGL | aph. basalt  | —    |
| 152 | 27,76138 | 17,98087 | 1125 | pre-EGL | aph. basalt  | —    |
| 153 | 27,76063 | 17,98067 | 1109 | pre-EGL | aph. basalt  | —    |
| 154 | 27,76019 | 17,98142 | 1089 | pre-EGL | ankaramite   | —    |
| 155 | 27,75930 | 17,98197 | 1070 | pre-EGL | basalt       | —    |
| 156 | 27,75878 | 17,98230 | 1065 | pre-EGL | plag. basalt | —    |
| 157 | 27,75767 | 17,98235 | 1046 | pre-EGL | plag. basalt | —    |
| 158 | 27,75843 | 17,98221 | 1045 | pre-EGL | aph. basalt  | —    |
| 159 | 27,75697 | 17,98399 | 1001 | pre-EGL | basalt       | —    |
| 160 | 27,77583 | 17,94294 | 980  | pre-EGL | aph. basalt  | 2710 |
| 161 | 27,75615 | 17,98582 | 966  | pre-EGL | ankaramite   | —    |
| 162 | 27,77485 | 17,94344 | 957  | pre-EGL | plag. basalt | —    |
| 163 | 27,77486 | 17,94345 | 957  | pre-EGL | ankaramite   | —    |
| 164 | 27,75604 | 17,98612 | 956  | pre-EGL | basalt       | —    |
| 165 | 27,75573 | 17,98677 | 935  | pre-EGL | basalt       | —    |
| 166 | 27,75554 | 17,98681 | 922  | pre-EGL | basalt       | —    |
| 167 | 27,75554 | 17,98693 | 903  | pre-EGL | aph. basalt  | —    |
| 168 | 27,74435 | 18,11209 | 877  | pre-EGL | basalt       | —    |
| 169 | 27,75517 | 17,98689 | 869  | pre-EGL | basalt       | —    |
| 170 | 27,74401 | 18,11038 | 861  | pre-EGL | aph. basalt  | —    |
| 171 | 27,75428 | 17,98788 | 853  | pre-EGL | basalt       | —    |
| 172 | 27,74349 | 18,10904 | 841  | pre-EGL | basalt       | —    |
| 173 | 27,74313 | 18,10879 | 825  | pre-EGL | aph. basalt  | —    |
| 174 | 27,74275 | 18,10799 | 817  | pre-EGL | basalt       | —    |
| 175 | 27,75403 | 17,98850 | 808  | pre-EGL | basalt       | —    |
| 176 | 27,74276 | 18,10749 | 800  | pre-EGL | basalt       | —    |
| 177 | 27,74277 | 18,10750 | 800  | pre-EGL | ankaramite   | —    |
| 178 | 27,73707 | 17,95264 | 780  | pre-EGL | ankaramite   | —    |
| 179 | 27,74271 | 18,10605 | 773  | pre-EGL | ankaramite   | —    |
| 180 | 27,74239 | 18,10580 | 757  | pre-EGL | ankaramite   | —    |
| 181 | 27,79997 | 17,97989 | 755  | pre-EGL | ankaramite   | 3010 |
| 182 | 27,74235 | 18,10518 | 743  | pre-EGL | ankaramite   | —    |
| 183 | 27,80082 | 17,98013 | 724  | pre-EGL | basalt       | 2870 |
| 184 | 27,80067 | 17,98018 | 723  | pre-EGL | ankaramite   | —    |
| 185 | 27,80030 | 17,98034 | 706  | pre-EGL | basalt       | —    |
| 186 | 27,79943 | 17,98073 | 682  | pre-EGL | basalt       | —    |
| 187 | 27,74247 | 18,10239 | 668  | pre-EGL | basalt       | —    |
| 188 | 27,80663 | 17,97708 | 665  | pre-EGL | ankaramite   | —    |
| 189 | 27,79930 | 17,98102 | 648  | pre-EGL | basalt       | —    |
| 190 | 27,79931 | 17,98103 | 648  | pre-EGL | ankaramite   | —    |
| 191 | 27,74258 | 18,10237 | 645  | pre-EGL | ankaramite   | —    |
| 192 | 27,75256 | 17,99162 | 644  | pre-EGL | basalt       | —    |

|     |          |          |     |         |              |      |
|-----|----------|----------|-----|---------|--------------|------|
| 193 | 27,75304 | 17,99124 | 643 | pre-EGL | basalt       | —    |
| 194 | 27,79895 | 17,98110 | 633 | pre-EGL | basalt       | —    |
| 195 | 27,74284 | 18,10129 | 624 | pre-EGL | aph. basalt  | —    |
| 196 | 27,75268 | 18,11980 | 620 | pre-EGL | ankaramite   | —    |
| 197 | 27,75269 | 18,11981 | 620 | pre-EGL | basalt       | —    |
| 198 | 27,79840 | 17,98123 | 619 | pre-EGL | trachyte     | 2420 |
| 199 | 27,79814 | 17,98132 | 607 | pre-EGL | aph. basalt  | —    |
| 200 | 27,79803 | 17,98153 | 590 | pre-EGL | plag. basalt | —    |
| 201 | 27,74324 | 18,10132 | 583 | pre-EGL | ankaramite   | —    |
| 202 | 27,79769 | 17,98152 | 569 | pre-EGL | aph. basalt  | —    |
| 203 | 27,74351 | 18,10128 | 553 | pre-EGL | aph. basalt  | —    |
| 204 | 27,79805 | 17,98188 | 545 | pre-EGL | basalt       | —    |
| 205 | 27,79836 | 17,98198 | 526 | pre-EGL | plag. basalt | —    |
| 206 | 27,79784 | 17,98216 | 514 | pre-EGL | trachyte     | 2360 |
| 207 | 27,74410 | 18,10112 | 506 | pre-EGL | aph. basalt  | —    |
| 208 | 27,74411 | 18,10113 | 506 | pre-EGL | ankaramite   | —    |
| 209 | 27,79720 | 17,97977 | 500 | pre-EGL | aph. basalt  | 2710 |
| 210 | 27,79819 | 17,98223 | 499 | pre-EGL | trachyte     | —    |
| 211 | 27,79811 | 17,98249 | 497 | pre-EGL | plag. basalt | —    |
| 212 | 27,74439 | 18,10109 | 489 | pre-EGL | ankaramite   | —    |
| 213 | 27,79774 | 17,98244 | 479 | pre-EGL | aph. basalt  | —    |
| 214 | 27,79754 | 17,98206 | 471 | pre-EGL | aph. basalt  | —    |
| 215 | 27,79728 | 17,98187 | 462 | pre-EGL | basalt       | —    |
| 216 | 27,74485 | 18,10116 | 450 | pre-EGL | ankaramite   | —    |
| 217 | 27,78659 | 17,92121 | 448 | pre-EGL | ankaramite   | 2990 |
| 218 | 27,79697 | 17,98217 | 443 | pre-EGL | basalt       | —    |
| 219 | 27,79492 | 17,98298 | 434 | pre-EGL | aph. basalt  | —    |
| 220 | 27,79567 | 17,98277 | 433 | pre-EGL | basalt       | —    |
| 221 | 27,74499 | 18,10089 | 430 | pre-EGL | ankaramite   | —    |
| 222 | 27,79469 | 17,98311 | 429 | pre-EGL | aph. basalt  | —    |
| 223 | 27,79436 | 17,98340 | 419 | pre-EGL | ankaramite   | —    |
| 224 | 27,79437 | 17,98341 | 419 | pre-EGL | basalt       | —    |
| 225 | 27,79379 | 17,98363 | 404 | pre-EGL | basalt       | —    |
| 226 | 27,79322 | 17,98389 | 395 | pre-EGL | basalt       | —    |
| 227 | 27,79236 | 17,98451 | 379 | pre-EGL | basalt       | —    |
| 228 | 27,79186 | 17,98471 | 369 | pre-EGL | basalt       | —    |
| 229 | 27,79141 | 17,98510 | 360 | pre-EGL | basalt       | —    |
| 230 | 27,79142 | 17,98532 | 354 | pre-EGL | aph. basalt  | —    |
| 231 | 27,79138 | 17,98556 | 336 | pre-EGL | aph. basalt  | —    |
| 232 | 27,79140 | 17,98573 | 326 | pre-EGL | aph. basalt  | —    |
| 233 | 27,79116 | 17,98613 | 307 | pre-EGL | basalt       | —    |
| 234 | 27,79060 | 17,98666 | 295 | pre-EGL | basalt       | —    |
| 235 | 27,78988 | 17,98464 | 290 | pre-EGL | aph. basalt  | 2720 |
| 236 | 27,79080 | 17,98679 | 279 | pre-EGL | ankaramite   | —    |
| 237 | 27,79081 | 17,98680 | 279 | pre-EGL | basalt       | —    |
| 238 | 27,79071 | 17,98704 | 249 | pre-EGL | basalt       | —    |
| 239 | 27,79025 | 17,98746 | 231 | pre-EGL | basalt       | —    |
| 240 | 27,78985 | 17,98797 | 219 | pre-EGL | aph. basalt  | —    |
| 241 | 27,78944 | 17,98846 | 211 | pre-EGL | basalt       | —    |
| 242 | 27,78928 | 17,98900 | 179 | pre-EGL | ankaramite   | —    |

|     |          |          |     |         |             |      |
|-----|----------|----------|-----|---------|-------------|------|
| 243 | 27,76695 | 17,91809 | 160 | pre-EGL | aph. basalt | 2700 |
| 244 | 27,78864 | 17,98902 | 158 | pre-EGL | basalt      | —    |

---

Lava types are divided into four categories, according to modal mineralogy: 1) aphyric to sub-aphyric (<5 vol. % phenocrysts of olivine/clinopyroxene/plagioclase, called aphyric basalt); 2) plagioclase-phyric (5-40 vol. %, called plagioclase basalt, which is sometimes referred to as “trachytes” in the literature); 3) moderately olivine- and/or clinopyroxene-phyric (5-20 vol. %, called basalt) and 4) highly olivine-clinopyroxene-phyric (>20 vol. %, called ankaramites). In Figure 1, the first three types are encompassed under the “crystal-poor” category. Where available, stratigraphic position and calculated magma density is also given.



**Table DR2:** Geometrical parameters used for the finite element simulations of conical edifices that experienced a volcano flank collapse.

|            | Height<br>[km]     | Radius<br>[km]     | Edifice<br>Volume<br>[km <sup>3</sup> ] | Collapse<br>Volume<br>[km <sup>3</sup> ] | % initial load |
|------------|--------------------|--------------------|-----------------------------------------|------------------------------------------|----------------|
| Augustine  | ~1.2 <sup>a</sup>  | 3.2 <sup>(*)</sup> | 13 <sup>a</sup>                         | 0.3 <sup>a</sup>                         | 0.4%           |
| St. Helens | 1 <sup>(*)</sup>   | 6 <sup>(*)</sup>   | 38 <sup>b</sup>                         | 2.5 <sup>c</sup>                         | 6.5%           |
| Parinacota | 1.5 <sup>(*)</sup> | 5.5 <sup>(*)</sup> | 45 <sup>d</sup>                         | 6 <sup>d</sup>                           | 13%            |
| Teno       | 5.3 <sup>e</sup>   | 25 <sup>e</sup>    | 3,500 <sup>(*)</sup>                    | ~50 <sup>f</sup>                         | 1,4%           |
| El Golfo   | 6 <sup>g</sup>     | 30 <sup>g</sup>    | 5,500 <sup>h</sup>                      | ~180 <sup>f</sup>                        | 3%             |
| Tahiti-Nui | 4 <sup>i</sup>     | 50 <sup>i</sup>    | 10,500 <sup>(*)</sup>                   | ~1,150 <sup>j</sup>                      | 7%             |
| Waianae    | ~6 <sup>(*)</sup>  | 63 <sup>(*)</sup>  | 25,000 <sup>k</sup>                     | ~6,100 <sup>l</sup>                      | 38%            |

(a) Siebert et al. (1995); (b) Voight et al. (1981); (c) McGuire (1996); (d) Hora et al. (2007); (e) Walter (2003); (f) Masson et al. (2002); (g) Gee et al. (2001); (h) Schmincke (1998); (i) Patriat et al. (2002); (j) Hildenbrand et al. (2004); (k) Robinson and Eakins (2006); (l) Presley et al. (1997).

(\*) Other values have been either calculated from other known parameters or estimated from digital elevation models and bathymetric maps.

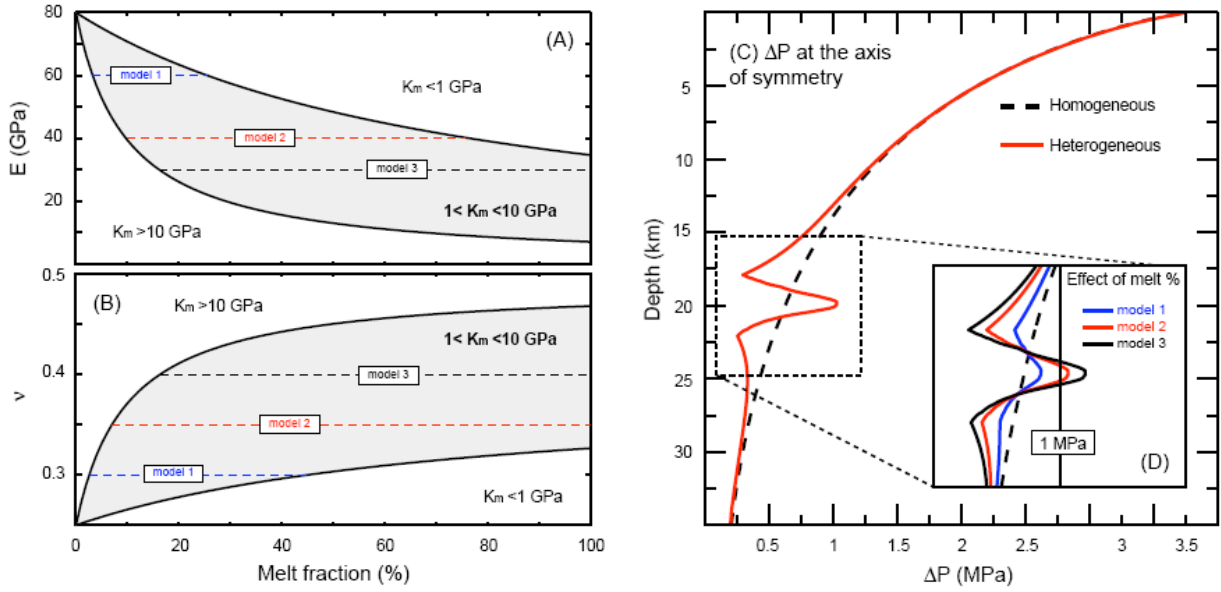

**Figure DR1:** Effect of melt %. (A & B) Effective elastic properties defined by Young's moduli ( $E$ ) and Poisson's ratios ( $\nu$ ) calculated using the theoretical relationships of Walsh (1969) for melt fractions varying from 0 to 100% within the magma storage zone. See section 3 for details of the calculations. (C) Decompression amplitudes caused by the El Golfo landslide calculated on the axis of symmetry of the FE models (see Fig. 2A of the main text). Results for homogeneous (dashed line) and heterogeneous (solid red line) models are compared. (D) Melt percentage within the magma storage zone significantly affects the mechanical response of the surrounding rock. "Model 2" corresponds to the mechanical setup used for the finite element models that are presented in the main text.

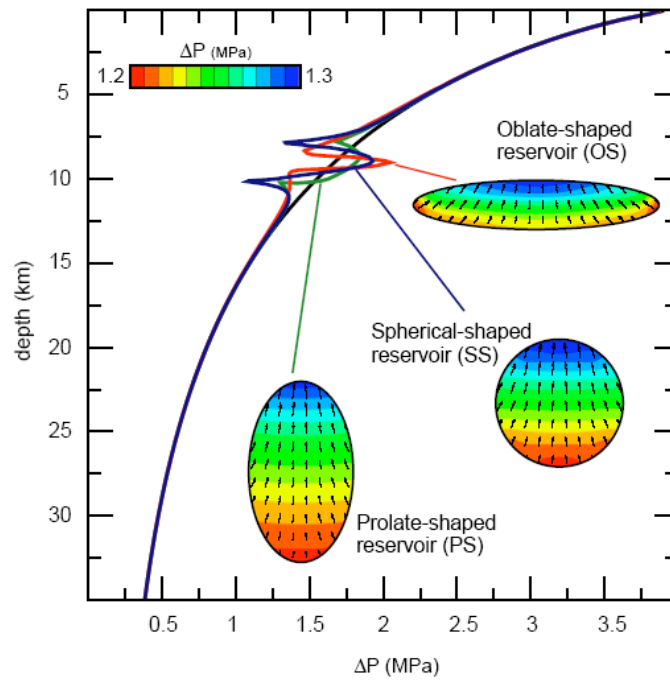

**Figure DR2:** Effect of shape of magma storage zone on landslide-induced decompression.
